# Supplementary material for: Use of a Lewis acid, a Brønsted acid, and their binary mixtures for the liquefaction of lignocellulose by supercritical ethanol processing
Source: Royal Society of Chemistry journal article supplement (doi:10.1039/d1se01316e), 2021-01-01
Supplement: d1se01316e1.pdf [file d1se01316e1.pdf]

## **Use of a Lewis acid, a Brønsted acid, and their binary mixtures for the liquefaction of lignocellulose by Supercritical Ethanol Processing**

Koray Alper<sup>a</sup>, Yun-Yan Wang<sup>b</sup>, Xianzhi Meng<sup>c</sup>, Kubilay Tekin<sup>d</sup>, Selhan Karagoz<sup>a</sup>, and Arthur J. Ragauskas<sup>b,c,e,\*</sup>

<sup>a</sup>Department of Chemistry, Karabük University, Karabük 78050, Turkey

<sup>b</sup>Center for Renewable Carbon, Department of Forestry, Wildlife, and Fisheries, University of Tennessee Institute of Agriculture, Knoxville, Tennessee 37996, United States

<sup>c</sup>Department of Chemical and Biomolecular Engineering, University of Tennessee, Knoxville, Tennessee 37996, United States

<sup>d</sup>Department of Environmental Engineering, Karabük University, Karabük 78050, Turkey

<sup>e</sup>Joint Institute of Biological Science, Biosciences Division, Oak Ridge National Laboratory, Oak Ridge, Tennessee 37831, United States

\*Corresponding Author:

Dr. Arthur J. Ragauskas

E-mail address: aragausk@utk.edu

**Table S1.** Identified compounds in bio-oils from the supercritical ethanol liquefaction of teak wood without and with MgClO<sub>4</sub> catalysts at 300 °C for 30 min

| Retention Time (min) | Compounds                                           | Area (%)         |                                             |                                             |                                              |
|----------------------|-----------------------------------------------------|------------------|---------------------------------------------|---------------------------------------------|----------------------------------------------|
|                      |                                                     | without catalyst | Mg(ClO <sub>4</sub> ) <sub>2</sub> (2 mmol) | Mg(ClO <sub>4</sub> ) <sub>2</sub> (5 mmol) | Mg(ClO <sub>4</sub> ) <sub>2</sub> (10 mmol) |
| 4.28                 | Hydroxy-acetic acid ethyl ester                     | 11.51            | -                                           | 4.28                                        | 3.45                                         |
| 5.26                 | 2-Hydroxypropanoic acid ethyl ester                 | 3.50             | 26.21                                       | 17.51                                       | 24.43                                        |
| 5.84                 | 2-Hydroxy-2-methylpropanoic acid ethyl ester        | -                | -                                           | 0.18                                        | -                                            |
| 5.97                 | 2-Cyclopenten-1-one                                 | -                | -                                           | 0.18                                        | -                                            |
| 7.11                 | 2-Furanmethanol                                     | 2.63             | -                                           | -                                           | -                                            |
| 9.23                 | 2-Methyl-2-cyclopenten-1-one                        | -                | -                                           | 0.54                                        | -                                            |
| 9.39                 | 1,1-Dimethoxyethane                                 | 3.67             | -                                           | -                                           | 6.09                                         |
| 9.40                 | 2-Hydroxybutanoic acid methyl ester                 | -                | 5.32                                        | -                                           | -                                            |
| 9.51                 | 2-Hydroxybutanoic acid ethyl ester                  | -                | -                                           | 4.22                                        | -                                            |
| 9.81                 | Butyrolactone                                       | -                | -                                           | 0.25                                        | -                                            |
| 9.97                 | Ethoxyacetic acid ethyl ester                       | -                | -                                           | 1.79                                        | 3.90                                         |
| 12.16                | Dihydro-5-methyl-2(3H)-furanone                     | -                | -                                           | 1.04                                        | 2.51                                         |
| 12.69                | 5-Methyl-2-furancarboxaldehyde                      | -                | -                                           | 0.87                                        | -                                            |
| 14.75                | 2,3-Dimethyl-2-cyclopenten-1-one                    | -                | -                                           | 0.93                                        | -                                            |
| 15.59                | 3-Hexenoic acid ethyl ester                         | -                | -                                           | 0.73                                        | 2.51                                         |
| 16.94                | 3-Methyl-1,2-cyclopentanedione                      | 1.97             | 2.79                                        | -                                           | -                                            |
| 18.12                | 2-Hexenoic acid ethyl ester                         | -                | -                                           | 0.74                                        | 3.42                                         |
| 18.73                | 2-Furancarboxylic acid ethyl ester                  | -                | -                                           | 1.34                                        | -                                            |
| 19.53                | 4-Oxo-pentanoic acid ethyl ester (Ethyl levulinate) | 1.42             | 4.36                                        | 7.56                                        | 13.43                                        |
| 20.45                | Butanoic acid anhydride                             | -                | 6.71                                        | 2.38                                        | -                                            |
| 20.99                | 2-Methoxyphenol                                     | 7.24             | 5.07                                        | 2.49                                        | -                                            |
| 21.22                | 4-Methylphenol                                      | -                | -                                           | 0.62                                        | -                                            |
| 23.18                | 3-Ethyl-2-hydroxy-2-cyclopenten-1-one               | 2.74             | 2.37                                        | 0.49                                        | -                                            |
| 25.41                | 2-Ethoxyphenol                                      | -                | -                                           | 0.48                                        | -                                            |
| 27.83                | Butanedioic acid diethyl ester                      | 2.20             | 2.47                                        | 2.55                                        | 2.12                                         |
| 28.11                | 2-Methoxy-4-methylphenol                            | 2.13             | 2.14                                        | 1.43                                        | -                                            |
| 29.65                | Diethyl methylsuccinate                             | -                | -                                           | 1.24                                        | -                                            |
| 33.89                | 4-Ethyl-2-methoxyphenol                             | 4.88             | 0.95                                        | 1.64                                        | -                                            |
| 34.57                | Pentanedioic acid diethyl ester                     | 1.96             | -                                           | 1.29                                        | -                                            |
| 38.75                | 2,6-Dimethoxyphenol                                 | 7.92             | 2.92                                        | -                                           | -                                            |
| 39.59                | 2-Methoxy-4-propylphenol                            | 5.30             | -                                           | -                                           | -                                            |
| 44.67                | 2-Methoxy-4-(1-propenyl)phenol                      | 6.80             | -                                           | -                                           | -                                            |
| 80.89                | (E)-9-Octadecenoic acid                             | -                | -                                           | 0.37                                        | -                                            |
| 87.04                | Diisooctyl adipate                                  | -                | 1.79                                        | -                                           | -                                            |
| 93.58                | Hexadecanoic acid ethyl ester                       | 0.63             | -                                           | 0.36                                        | -                                            |
| 93.60                | Octadecanoic acid ethyl ester                       | -                | -                                           | 1.30                                        | 2.41                                         |
| 94.02                | Squalene                                            | -                | 5.23                                        | -                                           | -                                            |
| 95.04                | 1-Nonadecene                                        | -                | -                                           | 0.56                                        | -                                            |
| 96.56                | 2,4,6-Trimethyl-tetracosanoic acid methyl ester     | -                | -                                           | 2.99                                        | 2.85                                         |
| 98.45                | Cyclotetracosane                                    | -                | -                                           | 1.25                                        | -                                            |
| 100.54               | Docosanoic acid ethyl ester                         | 0.93             | -                                           | -                                           | -                                            |

**Table S2.** Identified compounds in bio-oils from the supercritical ethanol liquefaction of teak wood without and with HClO<sub>4</sub> catalysts at 300 °C for 30 min.

| Retention Time (min) | Compounds                                           | Area (%)         |                            |                            |                             |
|----------------------|-----------------------------------------------------|------------------|----------------------------|----------------------------|-----------------------------|
|                      |                                                     | without catalyst | HClO <sub>4</sub> (2 mmol) | HClO <sub>4</sub> (5 mmol) | HClO <sub>4</sub> (10 mmol) |
| 4.28                 | Hydroxyacetic acid ethyl ester                      | 11.51            | 9.70                       | 8.57                       | -                           |
| 5.26                 | 2-Hydroxypropanoic acid ethyl ester                 | 3.50             | -                          | 5.24                       | 1.47                        |
| 5.89                 | Furfural                                            | -                | -                          | 0.80                       | -                           |
| 7.11                 | 2-Furanmethanol                                     | 2.63             | 3.10                       | -                          | -                           |
| 9.36                 | 2-Hydroxybutanoic acid ethyl ester                  | -                | 1.08                       | -                          | 0.41                        |
| 9.39                 | 1,1-Dimethoxyethane                                 | 3.67             | -                          | 1.37                       | -                           |
| 12.09                | Dihydro-5-methyl-2(3H)-furanone                     | -                | -                          | -                          | 1.35                        |
| 12.64                | 5-Methyl-2-furancarboxaldehyde                      | -                | -                          | 1.16                       | -                           |
| 16.94                | 3-Methyl-1,2-cyclopentanedione                      | 1.97             | -                          | -                          | -                           |
| 17.06                | 2-Hydroxy-3-methyl-2-cyclopenten-1-one              | -                | 3.56                       | 2.34                       | -                           |
| 18.71                | 2-Furancarboxylic acid ethyl ester                  | -                | -                          | 0.98                       | 1.23                        |
| 19.53                | 4-Oxo-pentanoic acid ethyl ester (Ethyl levulinate) | 1.42             | 3.43                       | 14.24                      | 29.45                       |
| 20.45                | 2-Furaldehyde diethyl acetal                        | -                | -                          | 3.54                       | 1.68                        |
| 20.99                | 2-Methoxyphenol                                     | 7.24             | 5.49                       | 3.16                       | 1.88                        |
| 23.18                | 3-Ethyl-2-hydroxy-2-cyclopenten-1-one               | 2.74             | 2.41                       | 1.31                       | -                           |
| 27.83                | Butanedioic acid diethyl ester                      | 2.20             | 2.83                       | 1.79                       | 1.61                        |
| 28.11                | 2-Methoxy-4-methylphenol                            | 2.13             | 2.59                       | 1.22                       | 0.82                        |
| 32.98                | 3-Methoxy-1,2-benzenediol                           | -                | -                          | 2.39                       | -                           |
| 33.89                | 4-Ethyl-2-methoxyphenol                             | 4.88             | 2.84                       | -                          | -                           |
| 34.57                | Pentanedioic acid diethyl ester                     | 1.96             | 1.44                       | -                          | -                           |
| 38.75                | 2,6-Dimethoxyphenol                                 | 7.92             | 5.99                       | 2.61                       | 1.20                        |
| 39.59                | 2-Methoxy-4-propylphenol                            | 5.30             | -                          | -                          | -                           |
| 44.67                | 2-Methoxy-4-(1-propenyl)phenol                      | 6.80             | -                          | -                          | -                           |
| 44.71                | 3-Hydroxy-4-methoxybenzoic acid                     | -                | -                          | 1.26                       | -                           |
| 44.73                | 4-Hydroxy-3-methoxy-benzoic acid                    | -                | 2.87                       | -                          | -                           |
| 50.92                | 4-Hydroxy-3-methoxy-benzeneacetic acid methyl ester | -                | -                          | -                          | 0.90                        |
| 52.87                | 4-Hydroxy-3-methoxy-benzoic acid ethyl ester        | -                | -                          | 1.09                       | 0.94                        |
| 56.07                | Ethyl homovanillate                                 | -                | -                          | 1.35                       | 0.92                        |
| 61.55                | Ethyl 3-(4-hydroxy-3-methoxyphenyl)propionate       | -                | -                          | 0.87                       | 0.47                        |
| 62.89                | Desaspidinol                                        | -                | 2.85                       | -                          | -                           |
| 62.93                | 1-(2,4,6-Trihydroxyphenyl)-2-pentanone              | -                | -                          | 5.75                       | 1.20                        |
| 90.52                | Octadecanoic acid ethyl ester                       | -                | 1.49                       | 0.46                       | 0.52                        |
| 93.58                | Hexadecanoic acid ethyl ester                       | 0.63             | -                          | -                          | -                           |
| 93.59                | Pentadecanoic acid ethyl ester                      | -                | -                          | 1.06                       | -                           |
| 96.53                | 2,4,6-Trimethyl-tetracosanoic acid methyl ester     | -                | 2.56                       | 1.27                       | 1.25                        |
| 100.57               | Docosanoic acid ethyl ester                         | 0.93             | 1.99                       | -                          | 0.89                        |

**Table S3.** Identified compounds in bio-oils from the supercritical ethanol liquefaction of teak wood without and with Mg(ClO<sub>4</sub>)<sub>2</sub>/HClO<sub>4</sub> catalysts at 300 °C for 30 min.

| Retention Time (min) | Compounds                                              | Area (%)         |                                                                      |                                                                     |                                                                      |
|----------------------|--------------------------------------------------------|------------------|----------------------------------------------------------------------|---------------------------------------------------------------------|----------------------------------------------------------------------|
|                      |                                                        | without catalyst | Mg(ClO <sub>4</sub> ) <sub>2</sub> /HClO <sub>4</sub> (2mmol/10mmol) | Mg(ClO <sub>4</sub> ) <sub>2</sub> /HClO <sub>4</sub> (5mmol/5mmol) | Mg(ClO <sub>4</sub> ) <sub>2</sub> /HClO <sub>4</sub> (10mmol/2mmol) |
| 4.28                 | Hydroxyacetic acid ethyl ester                         | 11.51            | -                                                                    | -                                                                   | 2.93                                                                 |
| 5.26                 | 2-Hydroxypropanoic acid ethyl ester                    | 3.50             | 3.53                                                                 | 12.45                                                               | 15.25                                                                |
| 7.11                 | 2-Furanmethanol                                        | 2.63             | -                                                                    | -                                                                   | -                                                                    |
| 9.39                 | 1,1-Dimethoxyethane                                    | 3.67             | -                                                                    | -                                                                   | -                                                                    |
| 9.41                 | 2-Hydroxybutanoic acid methyl ester                    | -                | -                                                                    | -                                                                   | 5.12                                                                 |
| 9.42                 | 3-Pentanol                                             | -                | -                                                                    | 4.57                                                                | -                                                                    |
| 9.93                 | Ethoxyacetic acid ethyl ester                          | -                | -                                                                    | 2.16                                                                | 2.56                                                                 |
| 10.70                | 2,5-Hexanedione                                        | -                | 0.95                                                                 | -                                                                   | -                                                                    |
| 12.21                | Dihydro-5-methyl-2(3H)-furanone                        | -                | 7.22                                                                 | 2.32                                                                | 4.02                                                                 |
| 14.75                | 2,3-Dimethyl-2-cyclopenten-1-one                       | -                | -                                                                    | 1.77                                                                | -                                                                    |
| 15.12                | Phenol                                                 | -                | 2.07                                                                 | 0.71                                                                | -                                                                    |
| 15.60                | 3-Hexenoic acid ethyl ester                            | -                | -                                                                    | 1.36                                                                | 2.28                                                                 |
| 16.94                | 3-Methyl-1,2-cyclopentanedione                         | 1.97             | -                                                                    | -                                                                   | -                                                                    |
| 18.12                | 2-Hexenoic acid ethyl ester                            | -                | -                                                                    | 1.55                                                                | 3.17                                                                 |
| 18.73                | 2-Furancarboxylic acid ethyl ester                     | -                | 1.28                                                                 | 1.59                                                                | 2.19                                                                 |
| 19.53                | 4-Oxo-pentanoic acid ethyl ester (Ethyl levulinate)    | 1.42             | 49.10                                                                | 12.74                                                               | 13.59                                                                |
| 20.99                | 2-Methoxyphenol                                        | 7.24             | 2.57                                                                 | 2.33                                                                | -                                                                    |
| 22.92                | 2,2,5,5-Tetramethyl-3-cyclopenten-1-one                | -                | -                                                                    | 1.30                                                                | -                                                                    |
| 23.18                | 3-Ethyl-2-hydroxy-2-cyclopenten-1-one                  | 2.74             | -                                                                    | -                                                                   | -                                                                    |
| 27.83                | Butanedioic acid diethyl ester                         | 2.20             | 2.44                                                                 | 1.71                                                                | 2.16                                                                 |
| 28.11                | 2-Methoxy-4-methylphenol                               | 2.13             | -                                                                    | -                                                                   | -                                                                    |
| 29.61                | Diethyl methylsuccinate                                | -                | -                                                                    | 1.84                                                                | 2.69                                                                 |
| 33.89                | 4-Ethyl-2-methoxyphenol                                | 4.88             | -                                                                    | -                                                                   | -                                                                    |
| 34.57                | Pentanedioic acid diethyl ester                        | 1.96             | -                                                                    | 1.49                                                                | 1.93                                                                 |
| 38.75                | 2,6-Dimethoxyphenol                                    | 7.92             | -                                                                    | -                                                                   | -                                                                    |
| 39.59                | 2-Methoxy-4-propylphenol                               | 5.30             | -                                                                    | -                                                                   | -                                                                    |
| 44.67                | 2-Methoxy-4-(1-propenyl)phenol                         | 6.80             | -                                                                    | -                                                                   | -                                                                    |
| 90.52                | Heptadecanoic acid ethyl ester                         | -                | 0.49                                                                 | 0.65                                                                | -                                                                    |
| 93.58                | Hexadecanoic acid ethyl ester                          | 0.63             | -                                                                    | -                                                                   | 0.82                                                                 |
| 93.59                | Octadecanoic acid ethyl ester                          | -                | -                                                                    | 2.68                                                                | -                                                                    |
| 93.59                | Pentadecanoic acid ethyl ester                         | -                | 1.72                                                                 | -                                                                   | 2.78                                                                 |
| 95.02                | 9-Hexacosene                                           | -                | -                                                                    | 0.68                                                                | -                                                                    |
| 95.03                | 1,2-Diethyl-cyclohexadecane                            | -                | 0.47                                                                 | -                                                                   | -                                                                    |
| 96.53                | [S-(R,S)]-2,10-Dimethylpentacosanoic acid methyl ester | -                | -                                                                    | 4.82                                                                | -                                                                    |
| 96.54                | 2,4,6-Trimethyltetracosanoic acid methyl ester         | -                | 3.82                                                                 | -                                                                   | -                                                                    |
| 98.10                | Cyclotetracosane                                       | -                | 0.45                                                                 | -                                                                   | -                                                                    |
| 98.42                | Cyclooctacosane                                        | -                | 1.01                                                                 | -                                                                   | -                                                                    |
| 98.43                | 1-Nonadecene                                           | -                | -                                                                    | 1.48                                                                | -                                                                    |
| 100.55               | Docosanoic acid ethyl ester                            | 0.93             | -                                                                    | -                                                                   | 3.93                                                                 |
| 100.56               | 2,9-Dimethyltetracosanoic acid methyl ester            | -                | -                                                                    | 3.92                                                                | -                                                                    |

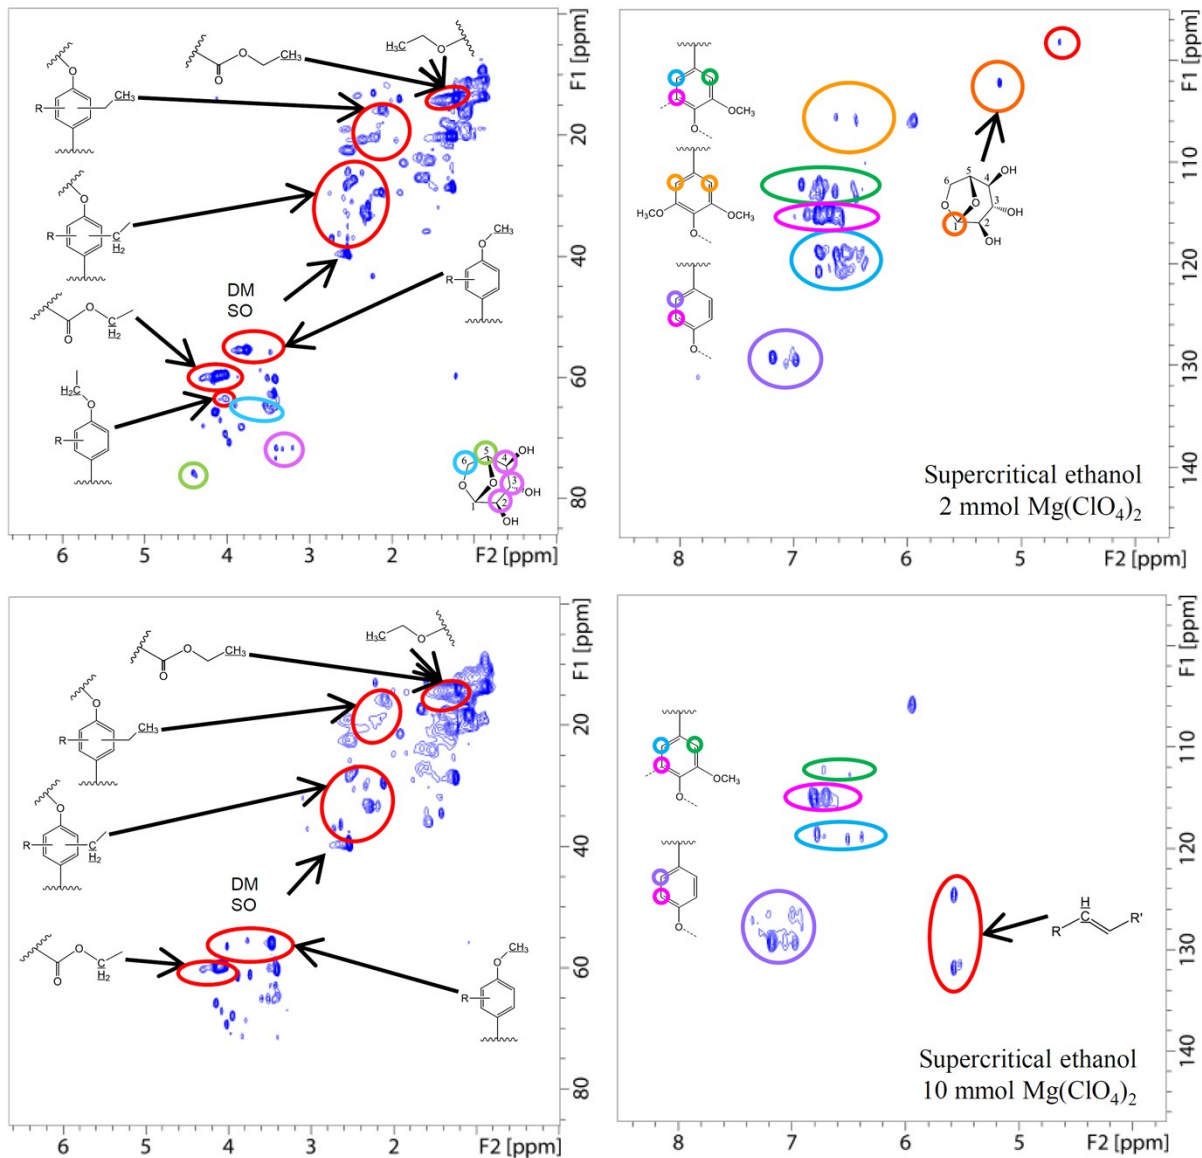

**Figure S1.** HSQC spectra of the bio-oils from the supercritical ethanol liquefaction of teak wood at 300 °C for 30 min using catalyst by 2 and 10 mmol  $\text{Mg}(\text{ClO}_4)_2$ .

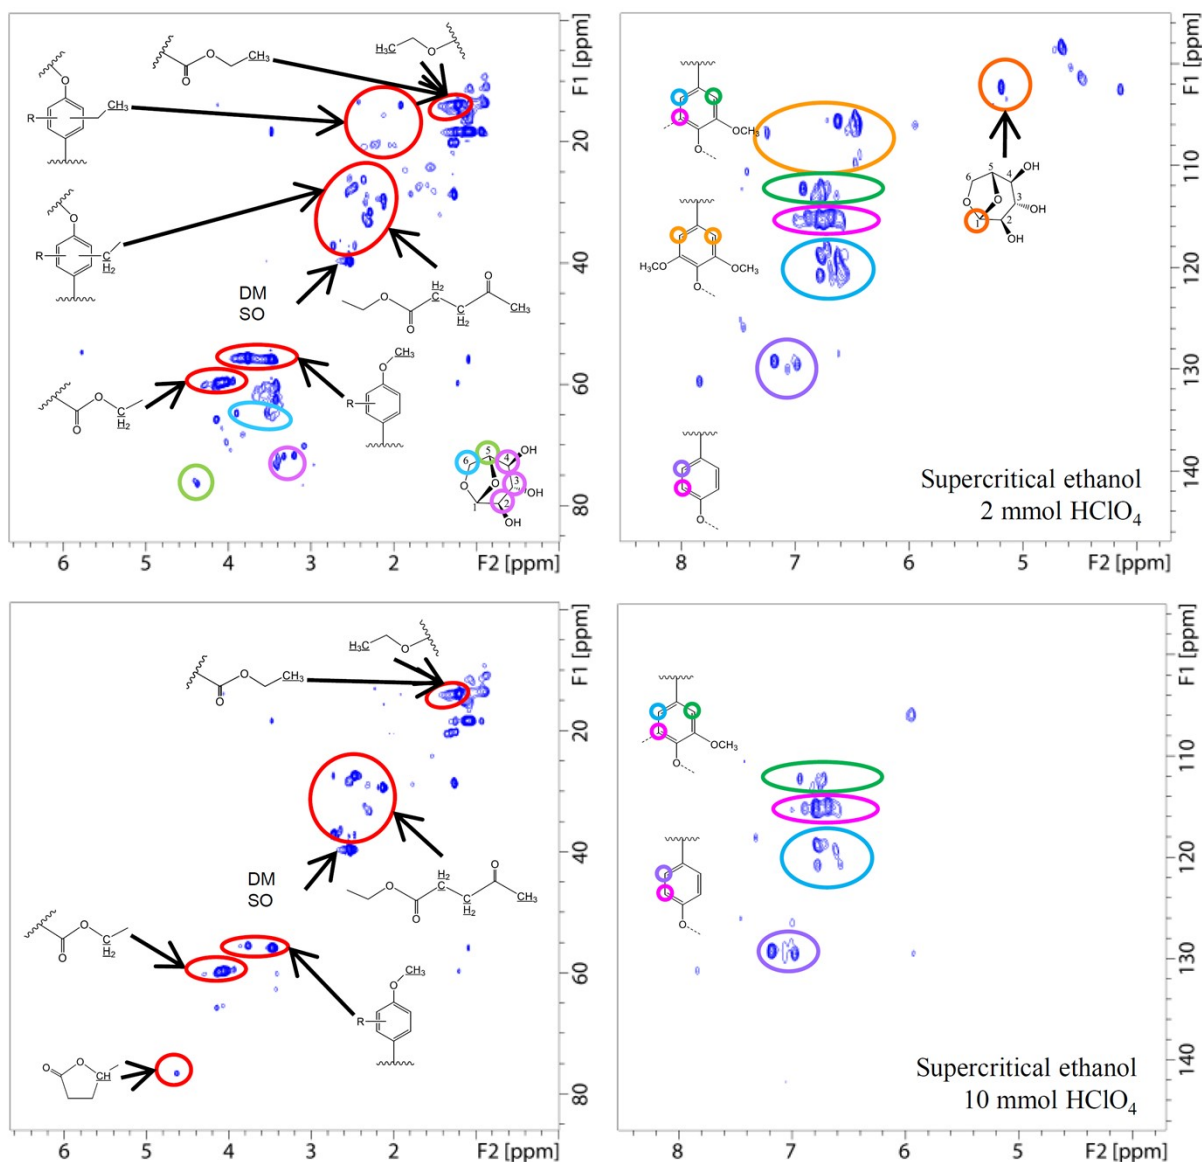

**Figure S2.** HSQC spectra of the bio-oils from the supercritical ethanol liquefaction of teak wood at 300 °C for 30 min using catalyst by 2 and 10 mmol HClO<sub>4</sub>.

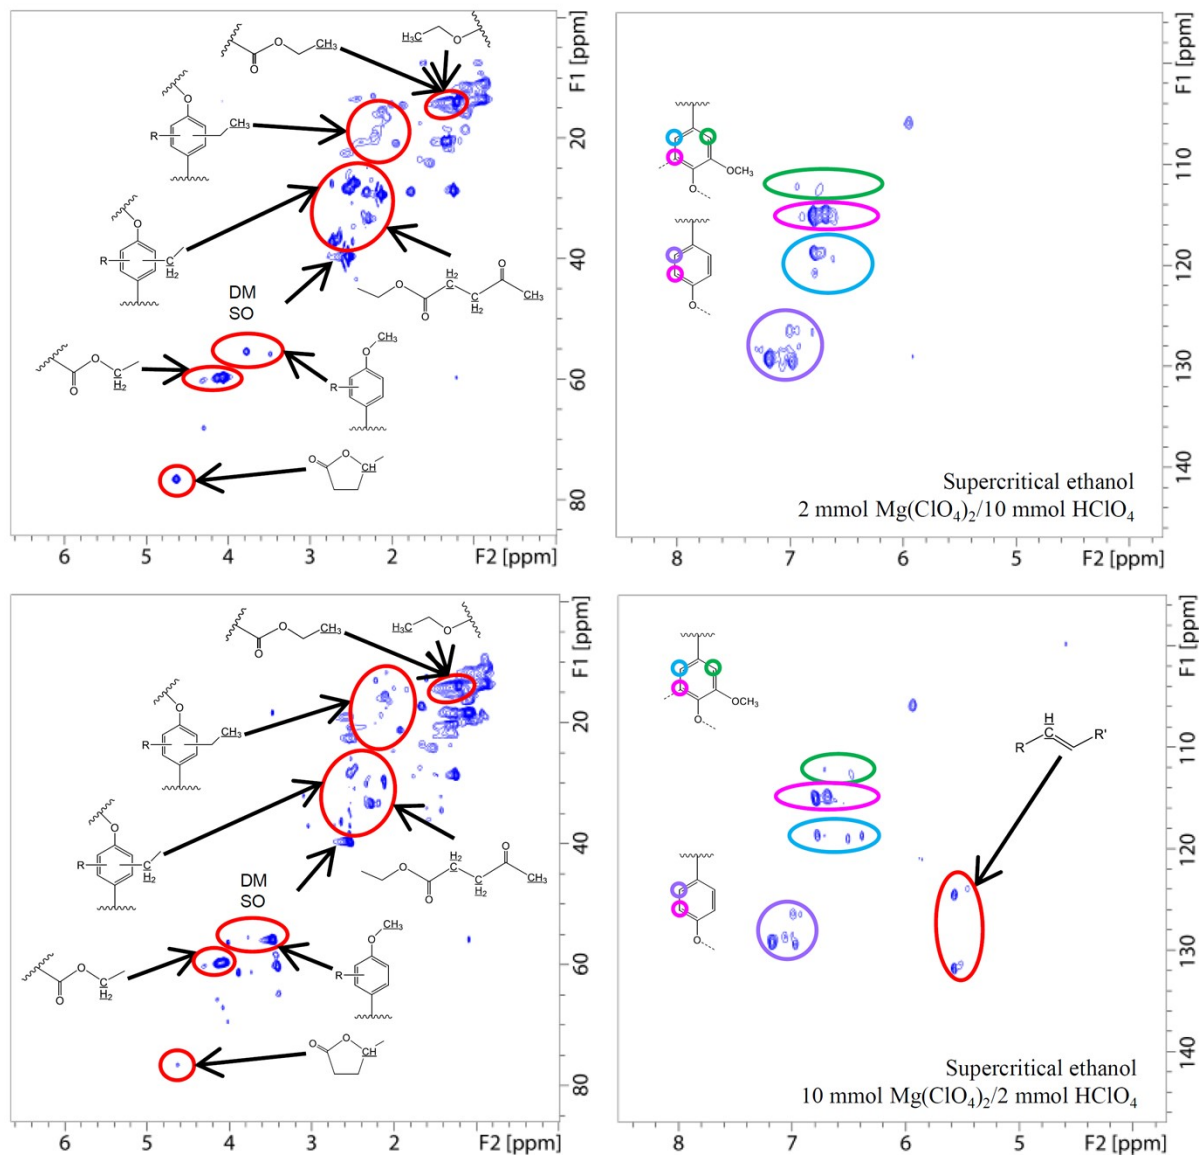

**Figure S3.** HSQC spectra of the bio-oils from the supercritical ethanol liquefaction of teak wood at 300 °C for 30 min using catalyst by 2 mmol/10 mmol and 10 mmol/2 mmol  $Mg(ClO_4)_2/HClO_4$ .

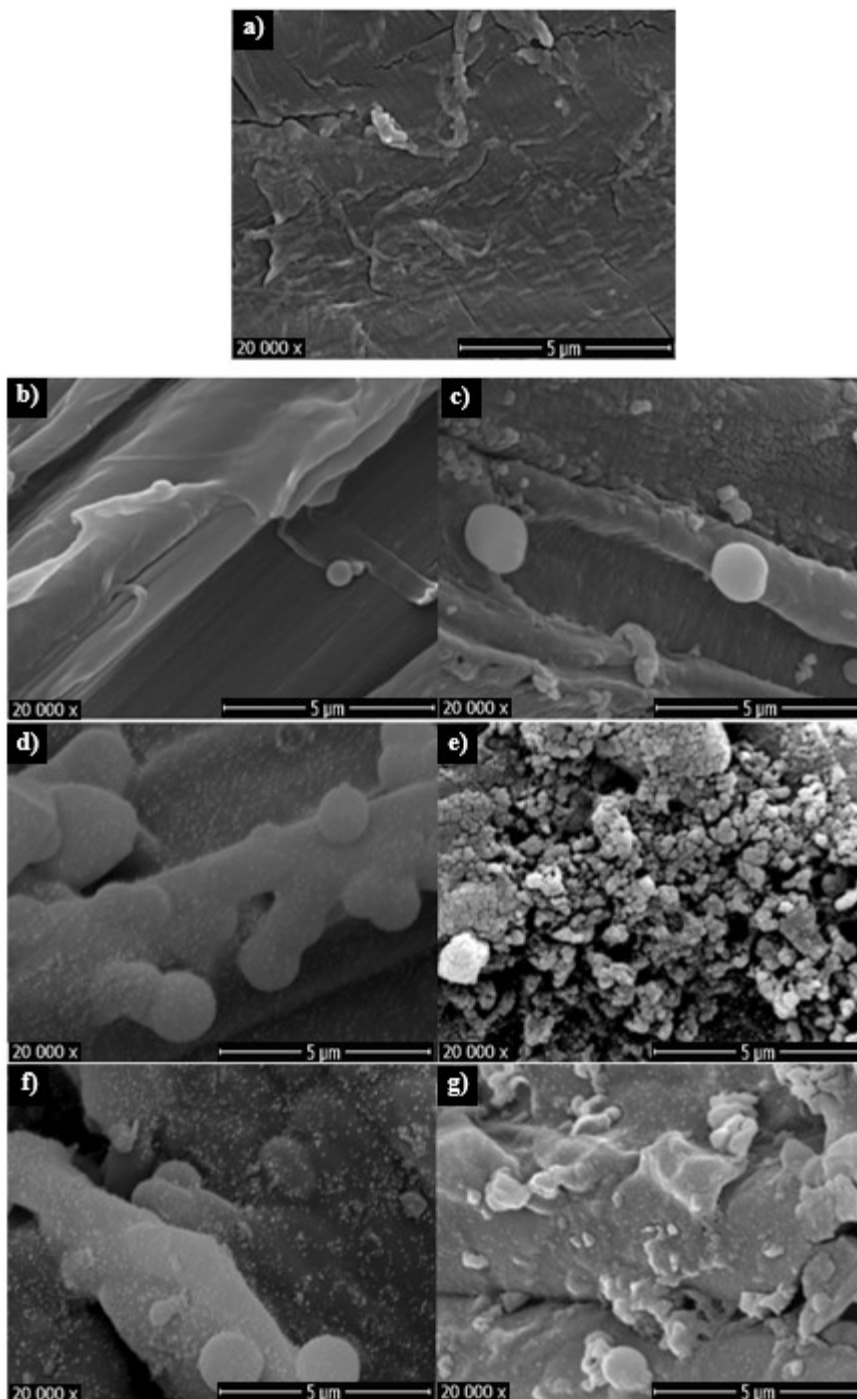

**Figure S4.** SEM images of teak wood and solid residues from the supercritical ethanol liquefaction of teak wood without and with catalysts at 300 °C for 30 min. a) Teak wood b) Solid residue from the non-catalytic hydrothermal liquefaction of teak wood c) Solid residue from the catalytic run with 10 mmol of  $\text{Mg}(\text{ClO}_4)_2$ , d) Solid residue from the catalytic run with 10 mmol of  $\text{HClO}_4$  e) Solid residue from the catalytic run with  $\text{Mg}(\text{ClO}_4)_2/\text{HClO}_4$  (10 mmol:2 mmol), f) Solid residue from the catalytic run with  $\text{Mg}(\text{ClO}_4)_2/\text{HClO}_4$  (2 mmol:10 mmol) g) 5 mmol  $\text{Mg}(\text{ClO}_4)_2/5$  mmol  $\text{HClO}_4$
